# Supplementary material
Source: HighWire-hosted journal article supplement (http://cmaj.ca/highwire/filestream/116611/field_highwire_adjunct_files/2/212097-res-3-at.pdf)
Supplement: 212097-res-3-at.pdf [file 212097-res-3-at.pdf]

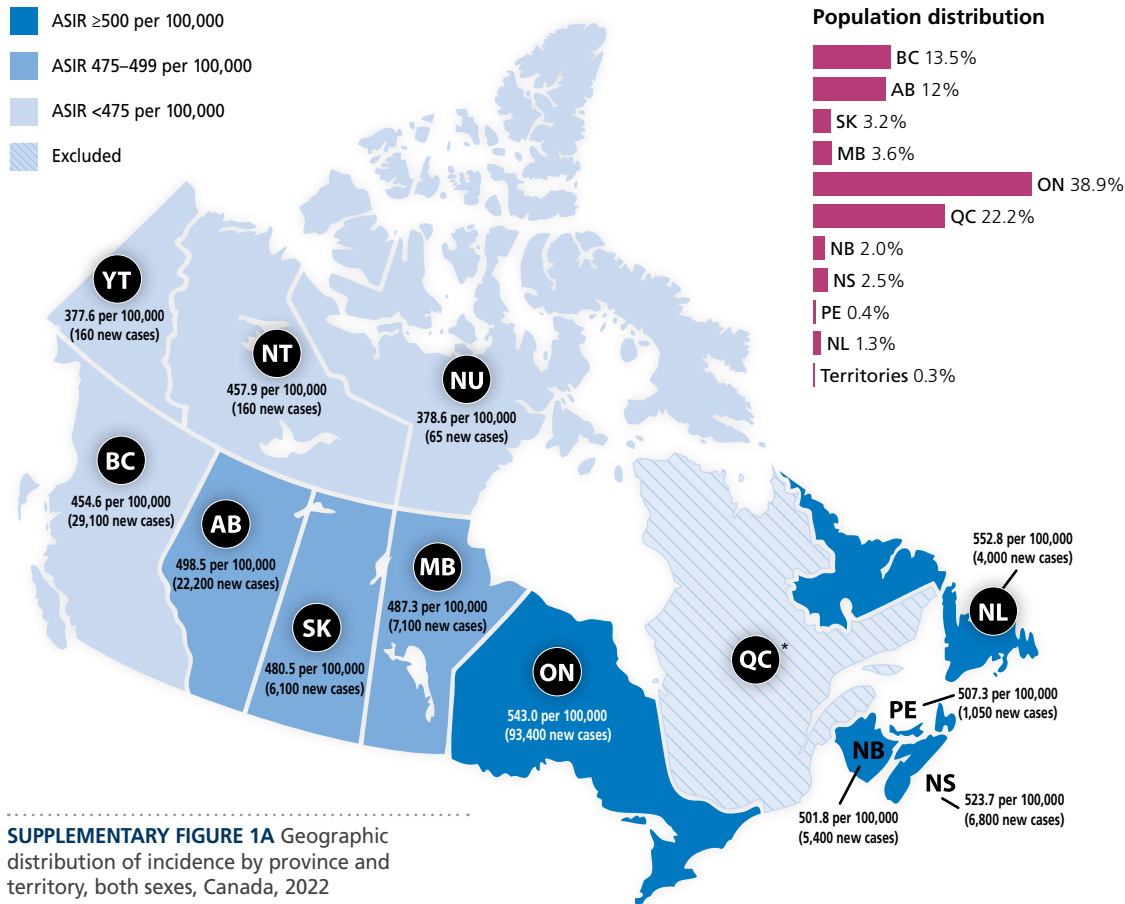

**SUPPLEMENTARY FIGURE 1A** Geographic distribution of incidence by province and territory, both sexes, Canada, 2022

ASIR=age-standardized incidence rate; BC=British Columbia; AB=Alberta; SK=Saskatchewan; MB=Manitoba; ON=Ontario; QC=Quebec; NB=New Brunswick; NS=Nova Scotia; PE=Prince Edward Island; NL=Newfoundland & Labrador; YT=Yukon; NT=Northwest Territories; NU=Nunavut

\* Quebec is excluded because a different projection method was used for Quebec than the other regions, meaning the estimates are not comparable.

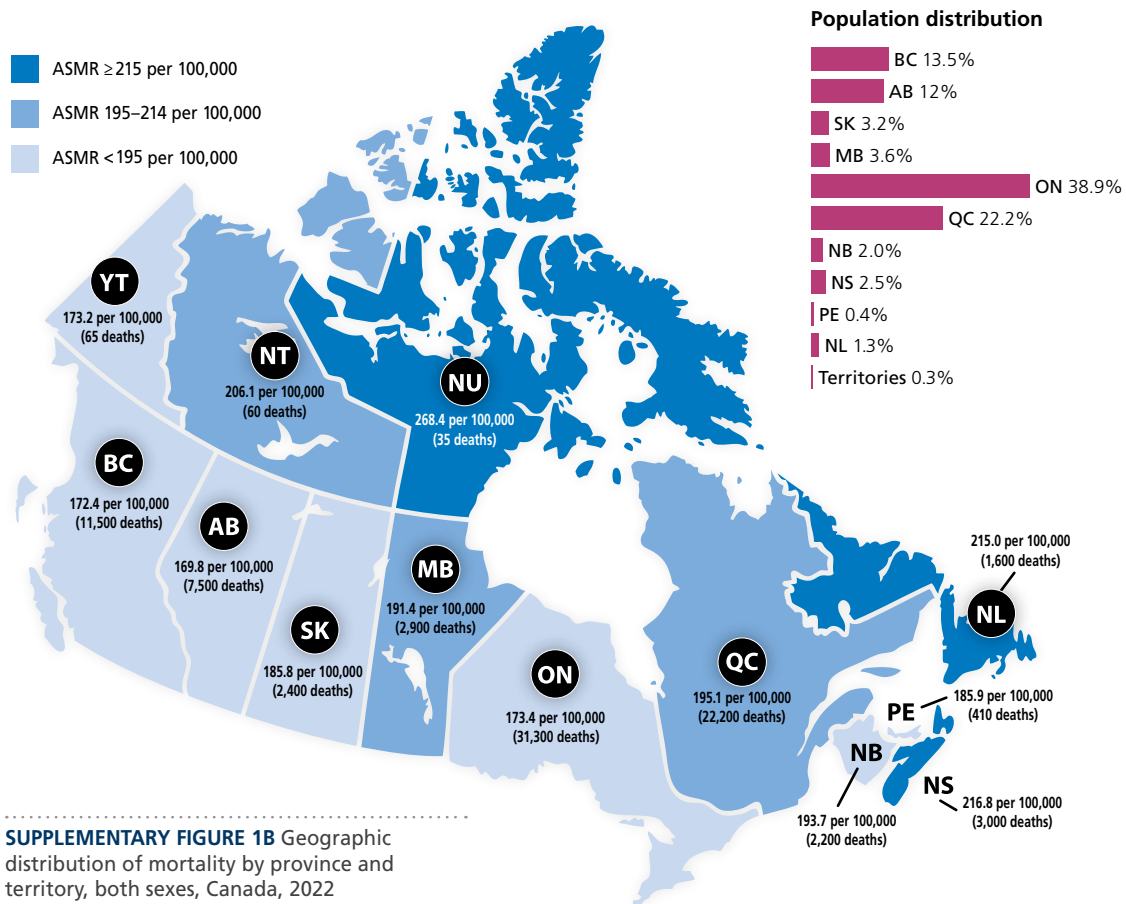

**SUPPLEMENTARY FIGURE 1B** Geographic distribution of mortality by province and territory, both sexes, Canada, 2022

ASMR=age-standardized mortality rate; BC=British Columbia; AB=Alberta; SK=Saskatchewan; MB=Manitoba; ON=Ontario; QC=Quebec; NB=New Brunswick; NS=Nova Scotia; PE=Prince Edward Island; NL=Newfoundland & Labrador; YT=Yukon; NT=Northwest Territories; NU=Nunavut
